# Supplementary material
Source: publisher site journal article supplement (https://www.spandidos-publications.com/8559/downloadSupplementary)
Supplement: Supplementary file 1 [file downloadSupplementary]

Table SI. Detailed information of datasets used in the present study.

| Dataset ID | Organism | Tissue subregion       | Platform | Control samples vs. DKD samples | Source of control group samples                                                     |
|------------|----------|------------------------|----------|---------------------------------|-------------------------------------------------------------------------------------|
| GSE30529   | Human    | Tubules                | GPL571   | 12 vs. 10                       | Biopsy samples from healthy living donors or unaffected portions of resected tumors |
| GSE30122   | Human    | Glomerulus and tubules | GPL571   | 50 vs. 19                       | Kidney tissue samples from non-diabetic living donors (healthy controls)            |

DKD, diabetic kidney disease.
